# Supplementary material
Source: publisher figshare collection journal article supplement (https://gsapubs.figshare.com/articles/dataset/_/12541154)
Supplement: Supplementary file 1 [file 1]

House, B.M., Bebout, G.E., and Hilton, D.R., 2019, Carbon cycling at the Sunda margin, Indonesia: A regional study with global implications: *Geology*, <https://doi.org/10.1130/G45830.1>

## Supplemental material

### *1. Detailed methods*

#### *1.1 Sediment analyses*

Sediment samples were obtained from archived DSDP, ODP, and piston cores from the Lamont-Doherty Earth Observatory (LDEO) core archive. Samples were dried at 50 °C, and sediment aliquots for Total Organic C (TOC) analysis were acidified using 1 N HCl for at least 12 hours or until effervescence ceased. Following acidification, samples were centrifuged and washed 3x with DI water and re-dried before homogenization with an agate mortar and pestle. Approximately 100 mg was combusted with Cu/CuO<sub>x</sub> in an evacuated quartz tube at 910 °C overnight. Resulting CO<sub>2</sub> was purified and collected on a gas line. Sample aliquots for carbonate analysis were acidified with 100% phosphoric acid at 70 °C in a Finnigan Gas Bench CO<sub>2</sub> handling system. For all samples, CO<sub>2</sub> was quantified using manometry, and all isotope measurements were conducted on a Finnigan MAT 252 mass spectrometer operated in dual inlet mode. All  $\delta^{13}\text{C}$  values are reported relative to VPDB C isotope standard. For measurements of C isotopic composition of carbonate within Altered Oceanic Crust (AOC), we used a microdrill to obtain samples of the carbonate veins and breccia matrix. These samples were then analyzed in an identical fashion to sedimentary C.

#### *1.2 Sediment and unit thicknesses*

Archived 3.5 kHz single channel seismic lines from the Lamont-Doherty Earth Observatory (LDEO) collection were used to determine overall sediment thickness and the thicknesses of geochemically distinct units outboard of the Sunda margin. Archived profiles from the following cruise tracks were used:

- RC 1107
- RC 1402
- RC 1403
- V 1909
- V 2009
- V 2410
- V 2819
- V 2901
- V 3503
- V 3616

Seafloor, basement, and unit boundary picks, made using the GeoMap App program for these profiles, were augmented with additional constraints from more recent published multichannel lines (Kopp and Kukowski, 2003; Lüschen et al., 2011; Kopp et al., 2006; Planert et al., 2010; Kopp, 2013; Kopp et al., 2009; McNeill et al., 2016; Dean et al., 2010). Geochemical unit boundaries (Nicobar Fan, terrigenous trenchfill, pelagic material, and calcareous turbidites) were defined by picks following the seismic interpretations in the Initial Report volumes of the appropriate DSDP/ODP sites and subsequent seismic studies. The terrigenous trenchfill unit is defined by reflectors that converge moving away from the trench, and the top of the Nicobar Fan was inferred to coincide with the base of this unit as reported elsewhere (e.g. Dean et al., 2010).

The base of the Nicobar Fan lacks clear seismic reflectors, and as such, we assumed a uniform thickness of 200 m for the underlying pelagic unit (which is intermediate between results from DSDP 211 and IODP 1480) rather than using dubious seismic picks to constrain the thickness of the Nicobar Fan unit (Expedition 22 Scientific Party, 1974; McNeill et al., 2017). The lower extent of the unit of calcareous turbidites from the Exmouth Plateau/Australian margin is defined by a distinct set of reflectors (Ludden and Gradstein, 1990), and since this unit is uppermost at Sites 261 and 765 where it is sampled, we infer that overlying sediment is likely to be quantitatively minimal throughout the margin. Therefore, constraining this unit's thickness – as well as that of the underlying pelagic sediments – was straightforward. The lack of a clear seismic boundary between the calcareous turbidite unit and the trenchfill wedge in seismic profiles along the southeastern portion of the margin led us to assign a thickness for the trenchfill unit by subtracting the thickness of the other units outboard of the trench from the overall sediment thickness at the trench. This approach, while necessary to constrain overall sediment flux to the trench, is unlikely to substantially affect our estimates of subducting C because the entirety of the trench wedge appears to be off-scraped through much of the margin. While the Roo Rise is inducing localized subduction erosion along eastern Java, sediment cover on the rise is minimal, and sediments trenchward of it are difficult to interpret from seismic profiles. Indeed, East Java stands out as a region of low sediment cover (Figures DR2 and DR3), so while our estimates consider the subduction of the thin sediment veneer currently present, significantly more sediment and sedimentary C may have subducted in the recent past when the Roo Rise first impinged upon the margin.

When seismic velocity profiles reported two-way travel time rather than sediment thickness and sediment velocity models were not available, sediment velocities of 2 and 2.5 km/s

were used to construct upper and lower bounds on sediment thickness respectively. While these velocities are greater than those determined for surficial sediments (Dean et al., 2010), they encapsulate the range of velocities expected for the deeper sediments that escape off-scraping at the deformation front along much of the margin. Therefore, these seismic velocity bounds are reasonable for estimating subducting C flux and may slightly overestimate the amount of sediment – and hence C – present at the trench. A total of ~8000 picks were made, and additional unit and sediment thickness constraints from DSDP Sites 211, 213, 260, 261, ODP Site 765, and IODP Site 1480 were also incorporated. Using these data, surfaces were constructed to model unit and overall sediment thicknesses and extrapolate these from core sites to the trench. With these models and results from sediment analyses, we estimated the amount and types of C within the sediment column at the trench.

Plate motion models of the Indoaustralian plate relative to the stable Sunda core from McNeill et al. (2014) were used to convert C content into a C flux to the trench, calculated at points along the trench that correspond to the MORVEL plate boundary between the Indoaustralian and Sunda plates (Argus et al., 2011). Single and multichannel seismic profiles as well as velocity models across the trench (Lüschen et al., 2011; Kopp et al., 2009, 2006; Kopp and Kukowski, 2003; Kopp et al., 2001; Planert et al., 2010) were used to estimate the fraction of the overall sediment and C flux bypassing the deformation front and subducting past ~20 km, the maximum seismically-resolved depth. These estimates were combined with those from McNeill et al. (2014) to generate upper and lower bounds on the sediment subducting past the deformation front. This range in possible subduction channel thickness leads to the range in estimates for subducted C amount.

## *2. Comparing shipboard and shore-based organic C analyses*

The tendency for disagreement between shipboard estimates of Total Organic C (TOC) made during coring expeditions and shorebased measurements has been previously documented (Olivarez Lyle and Lyle, 2006). Shipboard TOC is typically not measured directly but calculated as the difference between total C (measured by combustion elemental analysis) and carbonate C (measured by coulometry). However, this method can lead to substantial uncertainty. Several hundred replicate shipboard analyses conducted on a total of 5 samples from IODP Site 1480 give one-sigma uncertainties of 35 to 180% (McNeill et al., 2017). Furthermore, comparing the pool of shipboard data from DSDP Sites 211, 260, 261, 262, and ODP Site 765 (Ludden and Gradstein, 1990; Plank and Ludden, 1992; Bode, 1974; Pimm, 1974) with our shore-based TOC results shows that we are unable to reproduce the highest shipboard TOC values and that the distribution of values is substantially different between ship- and shore-based analyses (Figure DR1). While these analyses were not conducted on precisely the same samples, the large number of data compiled suggests a true difference between the two distributions, and indeed a one-tailed non-parametric unpaired t-test reveals that the mean of shipboard data is higher than that of shorebased data at a statistically significant level ( $p < 10^{-10}$ ). This suggests that using shipboard data is likely to overestimate of the abundance of organic C and to overemphasize its importance in C-cycling. Future studies of organic C cycling at convergent margins should therefore rely on shorebased reanalysis of shipboard samples.

### *3. Caveats in determining provenance of arc CO<sub>2</sub>*

The three endmember mixing model of Sano and Marty (1995) has been used previously to establish the provenance of volcanic and hydrothermal CO<sub>2</sub> released along Indonesia (Halldórsson et al., 2013; Figure DR3). In this model, the  $\delta^{13}\text{C}$  and CO<sub>2</sub>/<sup>3</sup>He composition of

volcano or hydrothermal CO<sub>2</sub> are used to resolve contributions from subducting carbonate and organic C as well as C from the mantle wedge. While the  $\delta^{13}\text{C}$  of organic C can be readily measured, the meaning of a CO<sub>2</sub>/<sup>3</sup>He ratio for organic C is less clear. A value of  $\sim 10^{14}$  is typically used for this ratio, as well as for the CO<sub>2</sub>/<sup>3</sup>He ratio of sedimentary carbonate (termed “limestone” in previous work; Marty et al., 1989; Hilton et al., 2002; Halldórsson et al., 2013). Because typical volcanic gases have a CO<sub>2</sub>/<sup>3</sup>He ratio of  $\sim 10^{10}$ , CO<sub>2</sub> provenance results from this mixing model are relatively insensitive to changes in these endmember compositions. However, the CO<sub>2</sub>/<sup>3</sup>He composition of the mantle wedge endmember is also required for the mixing model, and small changes in this value can have enormous effects on inferred CO<sub>2</sub> provenance.

A value of  $\sim 2.7 \times 10^9$  is usually used for the CO<sub>2</sub>/<sup>3</sup>He ratio of the mantle wedge (e.g. Hilton et al., 2002), but this value reflects the average of measurements of volatile concentrations in mid-ocean ridge glasses, which show significant variation (e.g. Graham, 2002), and may not represent the composition of the extensively flux-melted mantle wedge. When the CO<sub>2</sub>/<sup>3</sup>He ratio in volcanic gas samples is relatively low, the precise CO<sub>2</sub>/<sup>3</sup>He ratio used for the mantle wedge endmember becomes very important. Using data from Varekamp et al. (1992) for Sirung volcano, even a 25% deviation from  $2.7 \times 10^9$  leads to a  $\sim 10$ -fold change in the ratio of CO<sub>2</sub> from carbonate to CO<sub>2</sub> from organic C inferred from the mixing model. Therefore, results from this mixing model should be used with caution, which is why we consider the simple balance between the  $\delta^{13}\text{C}$  of the subducting sedimentary C and the  $\delta^{13}\text{C}$  of volcanic CO<sub>2</sub> to infer that an additional <sup>13</sup>C rich reservoir external to sedimentary C is likely contributing to the arc-released CO<sub>2</sub>. We note that one of the recent studies invoking significant CO<sub>2</sub> contributions from carbonates in the overlying crust relied almost entirely on this mixing model to argue for the global importance of this CO<sub>2</sub> source (Mason et al., 2017). It is worth noting that both the Sunda

and Central American subduction margins, which this model infers to have substantial contributions from crustal carbonate, are regions in which a significant amount of carbonate-rich sediments are subducting.

Additionally, this mixing model does not permit differentiation of carbonate CO<sub>2</sub> source (i.e. sedimentary carbonate, carbonate in altered oceanic crust, or carbonate in the overriding plate) due to their indistinguishable  $\delta^{13}\text{C}$  values. Likewise, our method of directly comparing the  $\delta^{13}\text{C}$  of subducting sediments with that of volcanic CO<sub>2</sub> reveals only that an additional carbonate source is needed to raise the  $\delta^{13}\text{C}$  of subducting C ( $\sim -13\%$ ) to that of arc CO<sub>2</sub> ( $\sim -4\%$ ). Thick limestone sequences in southern Sumatra and Java have been explored as potential hydrocarbon reservoirs, and because of this, they may contribute a substantial quantity of CO<sub>2</sub> to volcanic emissions (e.g. Deegan et al., 2010). However, we find little evidence for extensive carbonate deposits in northern Sumatra, particularly in the regions of greatest volcanic activity and hence densest sampling (Wilson, 2002). This section of the margin also shows the greatest potential for subduction of organic-rich Nicobar Fan sediments, and even if the décollement is below the fan deposits as has been hypothesized (Hüpers et al., 2017), the amount of organic and inorganic C subducting in sediments will be approximately equal, and an additional C source will be required to balance the  $\delta^{13}\text{C}$  of the sedimentary influx with that of volcanic CO<sub>2</sub>. Carbonates in the overlying crust could be a significant factor in closing the C cycling budget, but we also consider carbonate in altered oceanic crust to be a likely contributor in the northern section of the margin, and therefore a possible C source both throughout this margin and others.

Other insight, potentially significant, regarding the mixing of C from multiple sources comes from study of deeply subducted metasedimentary rocks containing varying proportions of C in carbonate (oxidized) and C in carbonaceous matter (reduced). Cook-Kollars et al. (2014)

159 and Kraft et al. (2017; manuscript in preparation) demonstrated extensive C isotope exchange  
160 between C in the two reservoirs as they attempted equilibration particularly at the higher  
161 temperatures represented in the suite. This exchange is most significant in pelite-carbonate  
162 mixed rocks inferred by Cook-Kollars et al. (2014) to have experienced the most C loss by  
163 decarbonation. Both the oxidized and the reduced C reservoirs were shifted in  $\delta^{13}\text{C}$  from their  
164 starting/oceanic compositions toward the “mantle value” of -6‰. Depending on the relative  
165 abundances of carbonaceous matter and carbonate in the samples, the reduced C is shifted from  
166  $\delta^{13}\text{C}$  values near -22‰ for low-grade rocks in which there is little re-equilibration with carbonate  
167 near 0‰ to values as high as -8‰ at the higher grades (also see Kraft et al., 2017). Carbonate C  
168 is shifted from  $\delta^{13}\text{C}$  values near +1‰ for low-grade rocks in which there is little re-equilibration  
169 with carbonate near 0‰ to values as low as -6‰ at the higher grades. Shift in the C isotope  
170 compositions of the two subducting C reservoirs would obviously have implications for the  
171 application of the three-component mixing model of Sano and Marty (1995). Yet unknown are  
172 the relative degrees of C release from each of these reservoirs during the devolatilization and  
173 partial melting beneath arcs at the subduction interface and in subducting slabs.



174 **References**

- 175 Argus, D.F., Gordon, R.G., and DeMets, C., 2011, Geologically current motion of 56 plates  
 176 relative to the no-net-rotation reference frame: *Geochemistry, Geophysics, Geosystems*, v.  
 177 12, p. n/a-n/a, doi: 10.1029/2011GC003751.
- 178 Bode, G., 1974, Proceedings of the Deep Sea Drilling Project, *in* Heirtzler, J., Veevers, J., and  
 179 Robinson, P. eds., *Proceedings of the Deep Sea Drilling Project Volume 27*, p. 499–502,  
 180 doi: doi:10.2973/dsdp.proc.27.1974.
- 181 Cook-Kollars, J., Bebout, G.E., Collins, N.C., Angiboust, S., and Agard, P., 2014, Subduction  
 182 Zone Metamorphic Pathway for Deep Carbon Cycling: I. Evidence from HP/UHP  
 183 Metasedimentary Rocks, Italian Alps: *Chemical Geology*, doi:  
 184 10.1016/j.chemgeo.2014.07.013.
- 185 Dean, S.M., McNeill, L.C., Henstock, T.J., Bull, J.M., Gulick, S.P., Austin, J.A., Bangs, N.L.,  
 186 Djajadihardja, Y.S., and Permana, H., 2010, Contrasting decollement and prism propoerties  
 187 over the Sumatra 2004-2005 earthquake rupture boundary: *Science*, v. 329, p. 207–210.
- 188 Deegan, F.M., Troll, V.R., Freda, C., Misiti, V., Chadwick, J.P., McLeod, C.L., and Davidson,  
 189 J.P., 2010, Magma-carbonate interaction processes and associated CO<sub>2</sub> release at Merapi  
 190 volcano, Indonesia: Insights from experimental petrology: *Journal of Petrology*, v. 51, p.  
 191 1027–1051, doi: 10.1093/petrology/egq010.
- 192 Expedition 22 Scientific Party, 1974, Site 211: Deep Sea Drilling Project Site Reports, v. 22, p.  
 193 13–36.
- 194 Graham, D.W., 2002, Noble gas isotope geochemistry of Mid-Ocean Ridge and Ocean Island  
 195 Basalts: Characterization of mantl source reservoirs, *in* Porcell, D., Ballentine, C.J., and  
 196 Wieler, R. eds., *Noble Gases in Geochemistry and Cosmochemistry*, Washington, DC,  
 197 Mineralogical Society of America, p. 247–318.
- 198 Halldórsson, S.A., Hilton, D.R., Troll, V.R., and Fischer, T.P., 2013, Resolving volatile sources  
 199 along the western Sunda arc, Indonesia: *Chemical Geology*, v. 339, p. 263–282, doi:  
 200 10.1016/j.chemgeo.2012.09.042.
- 201 Hilton, D.R., Fischer, T.P., and Marty, B., 2002, Noble gases and volatile recycling at subduction  
 202 zones, *in* Porcelli, D., Ballentine, C.J., and Wieler, R. eds., *Noble gases in geochemistry and*  
 203 *cosmochemistry*, v. 47.
- 204 Hüpers, A., Torres, M.E., Owari, S., McNeill, L.C., Dugan, B., Henstock, T.J., Milliken, K.L.,  
 205 Petronotis, K.E., Backman, J., Bourlange, S., Chemale, F., Chen, W., Colson, T.A.,  
 206 Frederik, M.C.G., et al., 2017, Release of mineral-bound water prior to subduction tied to  
 207 shallow seismogenic slip off Sumatra: *Science*, v. 356, doi: 10.1126/science.aal3429.
- 208 Kopp, H., 2013, Invited review paper: The control of subduction zone structural complexity and  
 209 geometry on margin segmentation and seismicity: *Tectonophysics*, v. 589, p. 1–16, doi:  
 210 10.1016/j.tecto.2012.12.037.
- 211 Kopp, H., Fleuh, E.R., Klaeschen, D., Bialas, J., and Reichert, C., 2001, Crustal structure of the  
 212 central Sunda margin at the onset of oblique subduction: *Geophysical Journal International*,  
 213 v. 147, p. 449–474.
- 214 Kopp, H., Flueh, E., Petersen, C., Weinrebe, W., Wittwer, A., and Scientists, M., 2006, The Java  
 215 margin revisited: Evidence for subduction erosion off Java: *Earth and Planetary Science*  
 216 *Letters*, v. 242, p. 130–142, doi: 10.1016/j.epsl.2005.11.036.
- 217 Kopp, H., Hindle, D., Klaeschen, D., Oncken, O., Reichert, C., and Scholl, D., 2009, Anatomy of  
 218 the western Java plate interface from depth-migrated seismic images: *Earth and Planetary*

- Science Letters, v. 288, p. 399–407, doi: 10.1016/j.epsl.2009.09.043.
- Kopp, H., and Kukowski, N., 2003, Backstop geometry and accretionary mechanics of the Sunda margin: Tectonics, v. 22, p. n/a–n/a, doi: 10.1029/2002tc001420.
- Kraft, K., and Bebout, G.E., 2017, Fate of subducting organic carbon: evidence from HP/UHP metamorphic suites, *in* AGU Fall meeting, New Orleans.
- Ludden, J.N., and Gradstein, F.M., 1990, Site 765: Proceedings of the Ocean Drilling Program Initial Reports, v. 123, p. 63–267.
- Lüschen, E., Müller, C., Kopp, H., Engels, M., Lutz, R., Planert, L., Shulgin, A., and Djajadihardja, Y.S., 2011, Structure, evolution and tectonic activity of the eastern Sunda forearc, Indonesia, from marine seismic investigations: Tectonophysics, v. 508, p. 6–21, doi: 10.1016/j.tecto.2010.06.008.
- Marty, B., Jambon, A., and Sano, Y., 1989, Helium isotopes and CO<sub>2</sub> in volcanic gases of Japan: Chemical Geology, v. 76, p. 25–40.
- Mason, E., Edmonds, M., and Turchyn, A. V., 2017, Remobilization of crustal carbon may dominate volcanic arc emissions: Science, v. 357, p. 290–294, doi: 10.1126/science.aan5049.
- McNeill, L.C., Dugan, B., and Petronotis, K., 2016, Expedition 362 Scientific Prospectus: International Ocean Discovery Program.
- McNeill, L.C., Dugan, B., Petronotis, K.E., and Expedition 362 Scientists, 2017, Site U1480, *in* Proceedings of the International Ocean Discovery Program, v. 362, doi: 10.14379/iodp.proc.362.103.2017.
- Olivarez Lyle, A., and Lyle, M.W., 2006, Missing organic carbon in Eocene marine sediments: Is metabolism the biological feedback that maintains end-member climates? Paleoceanography, v. 21, doi: 10.1029/2005pa001230.
- Pimm, A.C., 1974, Sedimentology and history of the northeastern Indian Ocean from Late Cretaceous to Recent: Initial reports of the Deep Sea Drilling Project, v. 22, p. 717–803, <http://hdl.handle.net/10.2973/dsdp.proc.22.139.1974>.
- Planert, L., Kopp, H., Lueschen, E., Mueller, C., Flueh, E.R., Shulgin, A., Djajadihardja, Y., and Krabbenhoft, A., 2010, Lower plate structure and upper plate deformational segmentation at the Sunda-Banda arc transition, Indonesia: Journal of Geophysical Research, v. 115, doi: 10.1029/2009jb006713.
- Plank, T., and Ludden, J.N., 1992, Geochemistry of sediments in the Argo Abyssal Plain at site 765: A continental margin reference section for sediment related recycling in subduction zones: Proceedings of the Ocean Drilling Program, Scientific Results, v. 123, p. 167–189.
- Sano, Y., and Marty, B., 1995, Origin of carbon in fumarolic gas from island arcs: Chemical Geology, v. 119, p. 265–274.
- Varekamp, J.C., Kreulen, R., Poorter, R.P.E., and van Bergen, M.J., 1992, Carbon sources in arc volcanism, with implications for the carbon cycle: Terra Nova, v. 4.
- Wilson, M.E.J., 2002, Cenozoic carbonates in Southeast Asia: Implications for equatorial carbonate development: Sedimentary Geology, v. 147, p. 295–428, doi: 10.1016/S0037-0738(01)00228-7.

263    Supplemental figures

264    Figure DR1

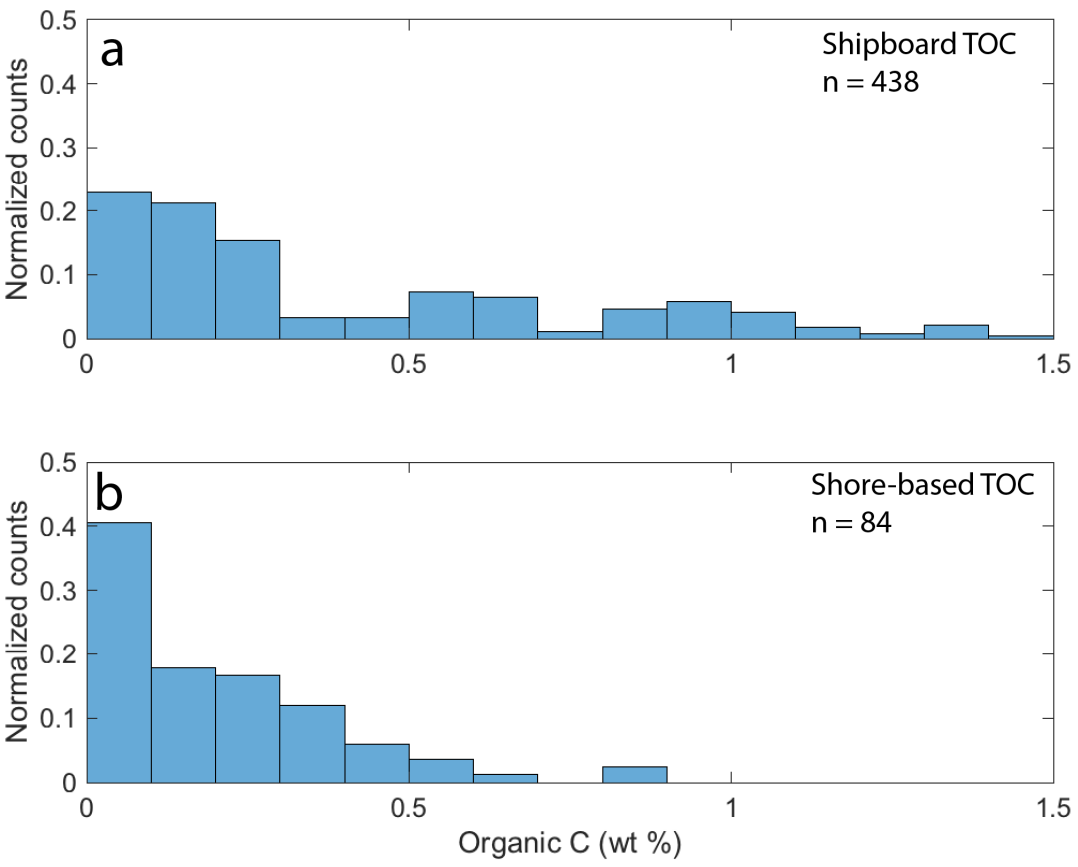

265

266

267

268

269 Figure DR2  
270

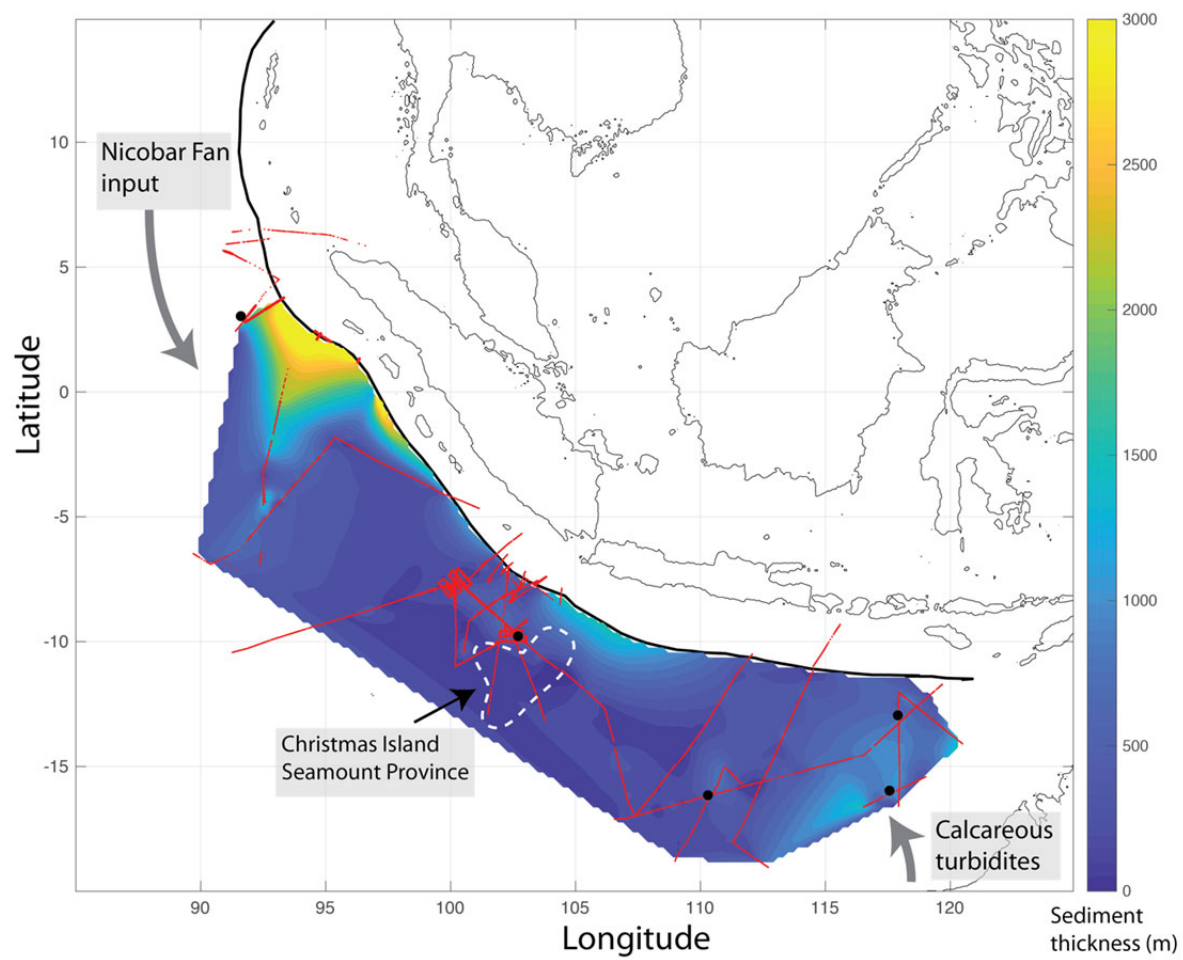

271

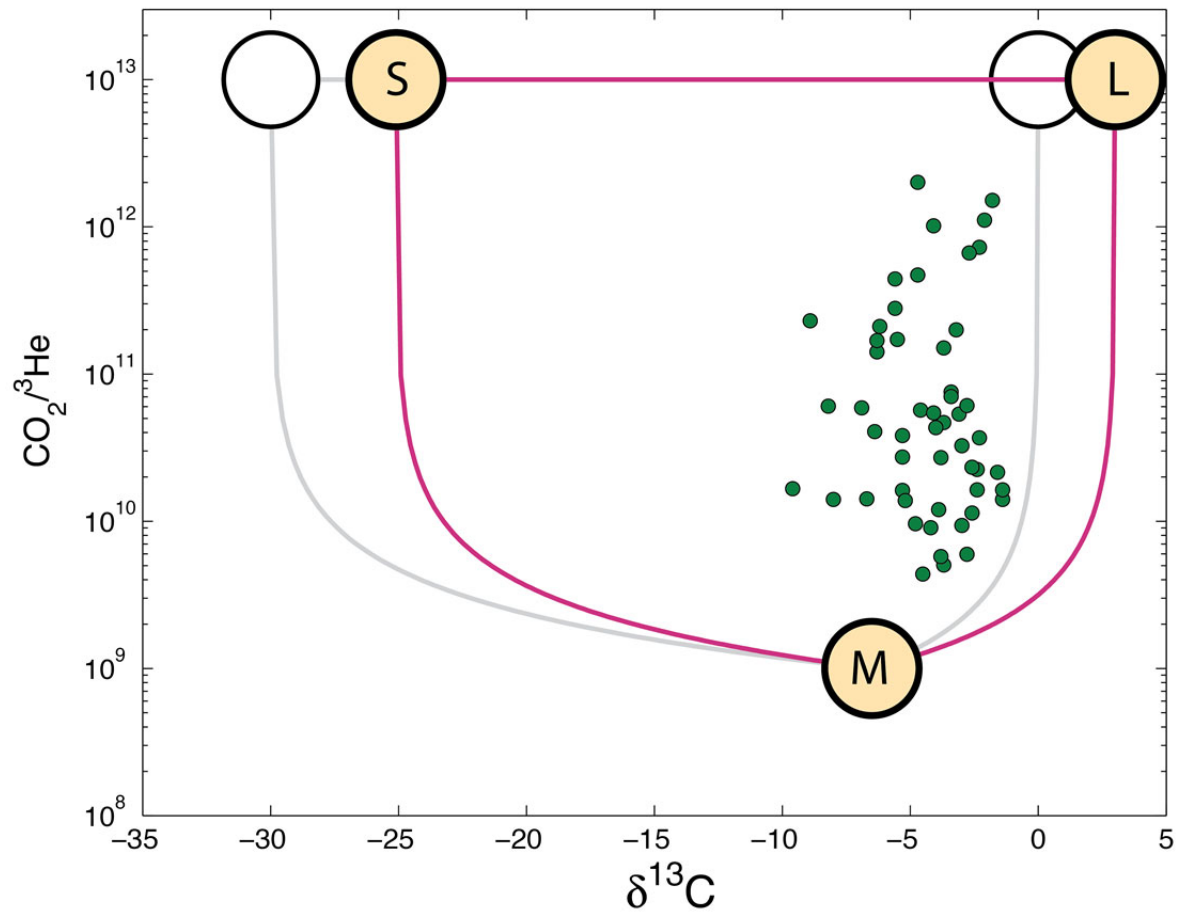

Figure captions

Figure DR1. Histograms showing distributions of shipboard (a) and shore-based (b) Total Organic Carbon (TOC) measurements generated for this study from DSDP 211, 213, 260, 261, 262 and ODP 765. Normalized counts represent the fraction of samples that fall within a given range of TOC values. Shipboard values are calculated as the difference between total C, measured by combustion elemental analysis, and carbonate C, measured by coulometry whereas shore-based values represent direct measurements of TOC following acidification to remove carbonate phases. While we were not able to analyze splits of precisely the same samples used for shipboard analyses, the pronounced difference in the distributions and number of data points strongly suggests that shipboard analyses overestimate the true TOC. Indeed, we were unable to reproduce TOC values over 0.86 wt% C with shore-based analyses.

Figure DR2. Model of overall sediment thickness model based on seismic picks (small red points) of seafloor and acoustic basement depth. Points outside the interpolated region represent regions where acoustic basement was not reliably imaged and picks could only be made to constrain unit thicknesses. Black points indicate the DSDP/ODP/IODP sites that are labeled in Fig. 1. The color scale saturates at 3 km sediment thickness. Material from the Nicobar Fan (to the northwest) and calcareous turbidites from the Australian margin (to the southeast) are separated by the Christmas Island Seamount Province.

299 Figure DR3. The three-endmember mixing model of Sano and Marty (1995) can be used to infer  
300 the provenance of volcanic CO<sub>2</sub> from measured  $\delta^{13}\text{C}$  and CO<sub>2</sub>/<sup>3</sup>He ratios in volcanic gases  
301 (Halldórsson et al., 2013; Varekamp et al., 1992). Solving a set of linear equations for the  
302 fraction of CO<sub>2</sub> from sedimentary carbonate (termed “limestone” in the original reference and  
303 represented the L endmember), organic C (termed “sedimentary” and denoted by S), and mantle  
304 wedge (M) sources. Open, unshaded circles represent global averages for the S and L  
305 endmembers that were used previously, and yellow circles represent values measured for this  
306 study. The CO<sub>2</sub>/<sup>3</sup>He ratio of the mantle wedge is inferred from measurements of Mid-Ocean  
307 Ridge Basalt (MORB), but whether these values accurately represent the mantle wedge  
308 composition is unclear. For some volcanoes, the results of this mixing model are exceedingly  
309 sensitive to the exact CO<sub>2</sub>/<sup>3</sup>He used.

**Table DR1. Concentrations and isotopic compositions of carbonate and organic C**

2019180\_Table DR1.xlsx
